# Supplementary material for: Using NIATx strategies to implement integrated services in routine care: a study protocol
Source: Springer Nature journal article supplement (doi:10.1186/s12913-018-3241-4), 2018-06-08
Supplement: MOESM1 [file 15831910]

| <b>Member Name</b>                                                                                                                                                                                           | <b>Notes</b>                                                                                       |
|--------------------------------------------------------------------------------------------------------------------------------------------------------------------------------------------------------------|----------------------------------------------------------------------------------------------------|
| <b><i>Demographic information from BHDS for baseline and 1yr f/u</i></b>                                                                                                                                     |                                                                                                    |
| FINAL_BHDS_DEMOGS                                                                                                                                                                                            |                                                                                                    |
| FINAL_BHDS_DEMOGS                                                                                                                                                                                            | M or F                                                                                             |
| FINAL_BHDS_DEMOGS                                                                                                                                                                                            | Y or N                                                                                             |
| FINAL_BHDS_DEMOGS                                                                                                                                                                                            | text descriptor or race                                                                            |
| FINAL_BHDS_DEMOGS                                                                                                                                                                                            |                                                                                                    |
| <b><i>MAT rx from BHDS for baseline and 1yr f/u. Link to FINAL_BHDS_NIATX_PGM_ADMITS on uniqueid where mat_rx_day is between admission and the 90-days following admission.</i></b>                          |                                                                                                    |
| FINAL_BHDS_MAT_NIATX                                                                                                                                                                                         | MAT drug name                                                                                      |
| FINAL_BHDS_MAT_NIATX                                                                                                                                                                                         | date of MAT rx                                                                                     |
| FINAL_BHDS_MAT_NIATX                                                                                                                                                                                         |                                                                                                    |
| <b><i>CD and MH Encounters from BHDS for baseline and 1yr f/u. Link to FINAL_BHDS_NIATX_PGM_ADMITS on uniqueid and provider where servdate is between admission and the 90-days following admission.</i></b> |                                                                                                    |
| FINAL_BHDS_NIATX_ENCOUNTERS                                                                                                                                                                                  | CD or MH                                                                                           |
| FINAL_BHDS_NIATX_ENCOUNTERS                                                                                                                                                                                  | (N)iatx or (W)aitlist                                                                              |
| FINAL_BHDS_NIATX_ENCOUNTERS                                                                                                                                                                                  | Text descriptor of SERI service                                                                    |
| FINAL_BHDS_NIATX_ENCOUNTERS                                                                                                                                                                                  | Text descriptor of NIATX service roll-up                                                           |
| FINAL_BHDS_NIATX_ENCOUNTERS                                                                                                                                                                                  | Provider Name                                                                                      |
| FINAL_BHDS_NIATX_ENCOUNTERS                                                                                                                                                                                  | service date                                                                                       |
| FINAL_BHDS_NIATX_ENCOUNTERS                                                                                                                                                                                  | Baseline or 1 yr follow-up                                                                         |
| FINAL_BHDS_NIATX_ENCOUNTERS                                                                                                                                                                                  |                                                                                                    |
| <b><i>Psycotropic rx from BHDS for baseline and 1yr f/u. Link to FINAL_BHDS_NIATX_PGM_ADMITS on uniqueid where psycotropic_rx_day is between admission and the 90-days following admission.</i></b>          |                                                                                                    |
| FINAL_BHDS_NIATX_MH_RX                                                                                                                                                                                       | date of psycotropic rx                                                                             |
| FINAL_BHDS_NIATX_MH_RX                                                                                                                                                                                       |                                                                                                    |
| <b><i>BHDS admissions (and constructed episodes) for baseline and 1yr f/u.</i></b>                                                                                                                           |                                                                                                    |
| FINAL_BHDS_NIATX_PGM_ADMITS                                                                                                                                                                                  | Admission Date                                                                                     |
| FINAL_BHDS_NIATX_PGM_ADMITS                                                                                                                                                                                  | Service Episode (ServiceEpi),<br>Program Enrollment(PgmEnroll),<br>or Calculated Episode (CalcEpi) |
| FINAL_BHDS_NIATX_PGM_ADMITS                                                                                                                                                                                  | Discharge Date                                                                                     |

|                                                                                                                 |                                |
|-----------------------------------------------------------------------------------------------------------------|--------------------------------|
| FINAL_BHDS_NIATX_PGM_ADMITS                                                                                     | (N)iatx or (W)aitlist          |
| FINAL_BHDS_NIATX_PGM_ADMITS                                                                                     | Provider Name                  |
| FINAL_BHDS_NIATX_PGM_ADMITS                                                                                     | Baseline or 1 yr follow-up     |
| FINAL_BHDS_NIATX_PGM_ADMITS                                                                                     |                                |
| <b><i>Pre-Baseline TARGET admits</i></b>                                                                        |                                |
| FINAL_TARGET_ADMITS                                                                                             |                                |
| FINAL_TARGET_ADMITS                                                                                             |                                |
| FINAL_TARGET_ADMITS                                                                                             | see TARGET data dictionary (1) |
| FINAL_TARGET_ADMITS                                                                                             | (N)iatx or (W)aitlist          |
| FINAL_TARGET_ADMITS                                                                                             | see TARGET data dictionary (1) |
| FINAL_TARGET_ADMITS                                                                                             | Provider Name                  |
| FINAL_TARGET_ADMITS                                                                                             |                                |
| <b><i>Pre-Baseline TARGET ASI variables. Link to FINAL_TARGET_ADMITS by uniqueid and admission_datetime</i></b> |                                |
| FINAL_TARGET_ASI                                                                                                | see TARGET data dictionary (1) |
| FINAL_TARGET_ASI                                                                                                | see TARGET data dictionary (1) |
| FINAL_TARGET_ASI                                                                                                | see TARGET data dictionary (1) |
| FINAL_TARGET_ASI                                                                                                | see TARGET data dictionary (1) |
| FINAL_TARGET_ASI                                                                                                | see TARGET data dictionary (1) |
| FINAL_TARGET_ASI                                                                                                | see TARGET data dictionary (1) |
| FINAL_TARGET_ASI                                                                                                | see TARGET data dictionary (1) |
| FINAL_TARGET_ASI                                                                                                | see TARGET data dictionary (1) |
| FINAL_TARGET_ASI                                                                                                | see TARGET data dictionary (1) |
| FINAL_TARGET_ASI                                                                                                | see TARGET data dictionary (1) |
| FINAL_TARGET_ASI                                                                                                | see TARGET data dictionary (1) |
| FINAL_TARGET_ASI                                                                                                | see TARGET data dictionary (1) |
| FINAL_TARGET_ASI                                                                                                | (N)iatx or (W)aitlist          |
| FINAL_TARGET_ASI                                                                                                | see TARGET data dictionary (1) |
| FINAL_TARGET_ASI                                                                                                | see TARGET data dictionary (1) |
| FINAL_TARGET_ASI                                                                                                | Provider Name                  |
| FINAL_TARGET_ASI                                                                                                | see TARGET data dictionary (1) |
| FINAL_TARGET_ASI                                                                                                | see TARGET data dictionary (1) |
| FINAL_TARGET_ASI                                                                                                | see TARGET data dictionary (1) |
| FINAL_TARGET_ASI                                                                                                | see TARGET data dictionary (1) |

|                                                                                                                                                                                 |                                          |
|---------------------------------------------------------------------------------------------------------------------------------------------------------------------------------|------------------------------------------|
| FINAL_TARGET_ASI                                                                                                                                                                | see TARGET data dictionary (1)           |
| FINAL_TARGET_ASI                                                                                                                                                                | see TARGET data dictionary (1)           |
| FINAL_TARGET_ASI                                                                                                                                                                | see TARGET data dictionary (1)           |
| FINAL_TARGET_ASI                                                                                                                                                                | see TARGET data dictionary (1)           |
| FINAL_TARGET_ASI                                                                                                                                                                |                                          |
| <b><i>Pre-Baseline TARGET encounters. Link to FINAL_TARGET_ADMITS by uniqueid and provider where the servdate is between admission and the 90-days following admission.</i></b> |                                          |
| FINAL_TARGET_ENCOUNTERS                                                                                                                                                         | CD or MH                                 |
| FINAL_TARGET_ENCOUNTERS                                                                                                                                                         | (N)iatx or (W)aitlist                    |
| FINAL_TARGET_ENCOUNTERS                                                                                                                                                         | Text descriptor of SERI service          |
| FINAL_TARGET_ENCOUNTERS                                                                                                                                                         | Provider Name                            |
| FINAL_TARGET_ENCOUNTERS                                                                                                                                                         | service date                             |
| FINAL_TARGET_ENCOUNTERS                                                                                                                                                         | Text descriptor of NIATX service roll-up |
| FINAL_TARGET_ENCOUNTERS                                                                                                                                                         |                                          |
| <b><i>Pre-Baseline TARGET gain scores. Link to FINAL_TARGET_ADMITS by uniqueid and admission_datetime</i></b>                                                                   |                                          |
| FINAL_TARGET_GAIN                                                                                                                                                               |                                          |
| FINAL_TARGET_GAIN                                                                                                                                                               | see TARGET data dictionary (1)           |
| FINAL_TARGET_GAIN                                                                                                                                                               | date GAIN was collected                  |
| FINAL_TARGET_GAIN                                                                                                                                                               | (N)iatx or (W)aitlist                    |
| FINAL_TARGET_GAIN                                                                                                                                                               | see TARGET data dictionary (1)           |
| FINAL_TARGET_GAIN                                                                                                                                                               | Provider Name                            |
| FINAL_TARGET_GAIN                                                                                                                                                               | see TARGET data dictionary (1)           |
| FINAL_TARGET_GAIN                                                                                                                                                               |                                          |
| <b><i>Pre-Baseline TARGET demographics. Link to FINAL_TARGET_ADMITS by uniqueid.</i></b>                                                                                        |                                          |
| FINAL_TARGET_IDS                                                                                                                                                                |                                          |
| FINAL_TARGET_IDS                                                                                                                                                                | M or F                                   |
| FINAL_TARGET_IDS                                                                                                                                                                | Y or N                                   |
| FINAL_TARGET_IDS                                                                                                                                                                | text descriptor or race                  |
| FINAL_TARGET_IDS                                                                                                                                                                |                                          |
| <b><i>Pre-Baseline TARGET MAT. Link to FINAL_TARGET_ADMITS by uniqueid where the mat_rx_day is between admission and the 90-days following admission.</i></b>                   |                                          |
| FINAL_TARGET_MAT                                                                                                                                                                | MAT drug name                            |

|                                                                                                                                                                                                                 |                        |
|-----------------------------------------------------------------------------------------------------------------------------------------------------------------------------------------------------------------|------------------------|
| FINAL_TARGET_MAT                                                                                                                                                                                                | date of MAT rx         |
| FINAL_TARGET_MAT                                                                                                                                                                                                |                        |
|                                                                                                                                                                                                                 |                        |
| <b><i>Pre-Baseline TARGET psycotropic rx. Link to FINAL_TARGET_ADMITS by uniqueid where the psycotropic_rx_day is between admission and the 90-days following admission.</i></b>                                |                        |
| FINAL_TARGET_NIATX_MH_RX                                                                                                                                                                                        | date of psycotropic rx |
| FINAL_TARGET_NIATX_MH_RX                                                                                                                                                                                        |                        |
|                                                                                                                                                                                                                 |                        |
| (1) <a href="https://www.dshs.wa.gov/sites/default/files/BHSIA/dbh/documents/_Data%20Dictionary_Massive.pdf">https://www.dshs.wa.gov/sites/default/files/BHSIA/dbh/documents/_Data%20Dictionary_Massive.pdf</a> |                        |
